1 **Running title:** First complete genome Measles virus Brazil

2

3 **Title:** Complete genome of a Measles virus from Roraima state, Brazil

4

5 Cátia Alexandra Ribeiro Meneses<sup>1#</sup>, Valdinete Alves do Nascimento<sup>2#</sup>, Victor Costa de  
6 Souza<sup>2#</sup>, Rodrigo Melo Maito<sup>1</sup>, Marconi Aragão Gomes<sup>1</sup>, Claudeth Rocha Santa Brígida  
7 Cunha<sup>1</sup>, Ilma de Aguiar Antony<sup>1</sup>, Maria Eliane Oliveira e Silva<sup>1</sup>, Daniela Palha de Souza  
8 Campos<sup>3</sup>, André de Lima Guerra Corado<sup>2</sup>, Karina Pinheiro Pessoa<sup>2</sup>, Dana Cristina da  
9 Silva Monteiro<sup>2</sup>, Osnei Okumoto<sup>4</sup>, Marília Coelho Cunha<sup>5</sup>, Flávia Caselli Pacheco<sup>5</sup>,  
10 Felipe Gomes Naveca<sup>2</sup>

11

12 <sup>#</sup> contributed equally to this work.

13

14 <sup>1</sup> Laboratório Central de Saúde Pública de Roraima, Secretaria de Estado da Saúde de  
15 Roraima, Boa Vista, Roraima, Brasil.

16 <sup>2</sup> Instituto Leônidas e Maria Deane, Fiocruz, Manaus, Amazonas, Brasil.

17 <sup>3</sup> Coordenadoria Geral de Vigilância em Saúde, Secretaria de Estado da Saúde de  
18 Roraima, Boa Vista, Roraima, Brasil.

19 <sup>4</sup> Secretaria de Vigilância em Saúde - SVS, Ministério da Saúde, Brasília, Distrito Federal,  
20 Brasil.

21 <sup>5</sup> Coordenação Geral de Laboratórios de Saúde Pública – CGLAB, SVS, Ministério da  
22 Saúde, Brasília, Distrito Federal, Brasil.

23

24 +Address correspondence to Felipe Gomes Naveca, [felipe.naveca@fiocruz.br](mailto:felipe.naveca@fiocruz.br)

25

## 26 SUMMARY

27 Measles is a human infectious disease of global concern caused by the measles  
28 virus. In this study, we report the complete genome sequencing of one measles isolate,  
29 genotype D8, obtained in Boa Vista city, the capital of the Roraima State, Brazil, directly  
30 from the urine sample. Phylogenetics reconstruction grouped the genome described in  
31 this study with samples from Australia, Italy, United Kingdom, and the USA. To our  
32 knowledge, this is the first complete genome of a wild-type measles virus from Latin  
33 America. Therefore, the present data strengthens the current knowledge about the  
34 molecular epidemiology of measles worldwide.

35 **Key words:** Measles virus; Brazil; Genotype; Genome, Viral.

36 **Sponsorships:** CNPq / CAPES / MS-DECIT / Fiocruz

37

38 Measles is a highly contagious airborne disease that begins as an acute febrile  
39 illness with fever, coryza, conjunctival hyperemia and cough, which are accompanied by  
40 a maculopapular skin rash. Some measles patients, mainly those immunocompromised,  
41 may evolve to severe complications including blindness and life-threatening forms as  
42 severe diarrhea and pneumonia. Two highly severe, but rare neurologic forms, are also  
43 related to measles virus infection, the measles inclusion-body encephalitis MIBE and the  
44 subacute sclerosing panencephalitis (SSPE) (1).

45           The measles virus is an enveloped, single-stranded, negative-sense RNA virus, with  
46 a genome around 16Kb that belongs to the *Paramyxoviridae* family, genus *Morbillivirus*.  
47 A total of eight proteins, six structural (nucleoprotein, phosphoprotein, matrix, fusion,  
48 haemagglutinin, and the large polymerase protein) and two non-structural (V and C  
49 proteins) are encoded by the viral genome (1). Due to the lack of proofreading activity of  
50 RNA polymerases and the higher viral titers achieved during the acute phase of illness,  
51 RNA viruses are more likely to accumulate variability in their genome's sequences, in  
52 comparison to DNA viruses (2). Regarding the measles virus, this diversity is reflected in  
53 24 genotypes known up to date (A, B1, B2, B3, C1, C2, D1, D2, D3, D4, D5, D6, D7, D8,  
54 D9, D10, D11, E, F, G1, G2, G3, H1, and H2), but from October 2017 to September 2018,  
55 only five genotypes (B3, D4, D8, D9, and H1) were reported ([http://www.who-](http://www.who-measles.org/Public/Data_Mnt/who_map.php)  
56 [measles.org/Public/Data\\_Mnt/who\\_map.php](http://www.who-measles.org/Public/Data_Mnt/who_map.php)).

57           Measles is a vaccine-preventable disease which has decreased mortality over the  
58 last decades. Since the 1980s, the total number of deaths related to measles illness  
59 dropped from more than 2 million to approximately 100,000 per year due to the  
60 improvement of social indicators (e.g., better nutrition), as well as the establishment of  
61 the global efforts to increase vaccination coverage (1). Nevertheless, timely surveillance  
62 of suspected measles cases with highly sensitive and specific molecular diagnostic tools,  
63 together with genetic characterization of isolates, is of paramount importance for the  
64 global efforts of virus elimination (1, 3).

65           In August 2018, the Central Laboratory of the Roraima State (LACEN-RR) started  
66 testing measles suspected samples using the Real-Time PCR protocol developed by  
67 CDC-USA. Procedures followed the annex 6.2 of the Manual for the Laboratory-based

68 Surveillance of Measles, Rubella, and Congenital Rubella Syndrome (Third edition, June  
69 2018) freely available at  
70 [http://www.who.int/immunization/monitoring\\_surveillance/burden/laboratory/Annex\\_6.2](http://www.who.int/immunization/monitoring_surveillance/burden/laboratory/Annex_6.2.pdf?ua=1)  
71 [.pdf?ua=1](http://www.who.int/immunization/monitoring_surveillance/burden/laboratory/Annex_6.2.pdf?ua=1). Since then, 172 samples were tested, and 39 were positive.

72 Thus, as a request of both Roraima's state and the Brazilian health surveillance  
73 authorities, we select one positive sample with high viral load (Ct 22.0) to submit for a  
74 protocol for the entire genome amplification and nucleotide sequencing. Initially, we  
75 aligned all measles D8 genomes with MAFFT v7.388 (4). The consensus sequence was  
76 used to design primers over the entire genome of measles D8 with the aid of Primal  
77 software (5) spanning around 400bp distances. Two other primers targeting the initial 28  
78 bases of the 5' UTR region and the final 25 bases of the 3' UTR were designed with a  
79 modified version of Primer3 v2.3.7 embedded in Geneious software v10.2.6 (6). This  
80 primer design may be used for NGS sequencing, as previously described for Zika virus  
81 (5), or capillary sequencing as we performed in this study. Primer sequences and the  
82 details for the RT-PCR scheme used for entire genome amplification and nucleotide  
83 sequencing are in the supplemental files 1 and 2 of this manuscript.

84 Briefly, four overlapping amplicons encompassing the entire measles genome were  
85 generated using Superscript IV One-Step RT-PCR System (ThermoFisher Scientific).  
86 Amplicons were precipitated with molecular biology grade PEG8000 and used as a  
87 template for nucleotide sequencing with BigDye terminator v3.1 in an ABI 3130 genetic  
88 analyzer.

89 A total of 63 trace files were trimmed for quality and used for assembly employing  
90 Geneious's map to reference tool and the NCBI measles reference sequence, available in

91 GenBank under accession number NC\_001498.1. The final whole genome sequence of  
92 MVs/Roraima.BRA/31.18[D8] isolate contains 15,894 nucleotides with no ambiguity, or  
93 unidentified (N) bases, a Q40 score of 99.8% and a GC content of 47.4 %.

94 Initially, the sequence reported here was genotyped using both the Nucleoprotein  
95 (N) gene and the Hemagglutinin (H) gene with the measles genotyping tool available at  
96 [http://www.who-measles.org/Public/Tool/genotype\\_tool.php](http://www.who-measles.org/Public/Tool/genotype_tool.php), and the D8 genotype was  
97 confirmed. Subsequently, we conducted a maximum likelihood phylogenetic analysis  
98 with PhyML (7) using the N gene region of the Roraima sample, the genotypes reference  
99 sequences available at MeaNS <http://www.who-measles.org/> and four other sequences  
100 representing the genotype D8 lineages (FJ765078.1 – MVi/Villupuram.Ind/03.07;  
101 JX486001.1 - MVi/Hulu-Langat.MYS/26.11; KF683445.1 -  
102 MVs/Frankfurt\_Main.DEU/17.11; KT588030.1 - MVs/Republic\_of\_Komi.RUS/35.13).  
103 This approach confirmed that the Roraima sample belongs to the lineage MVi/Hulu-  
104 Langat.MYS/26.11 (Supplemental file 3).

105 Secondly, a BLAST search was conducted using the megablast algorithm against  
106 the entire NR database. The first five closest matches are samples from Brisbane,  
107 Australia (MH638233, score 29137, 15834/15862 identical sites); Ancona, Italy  
108 (MH173047, score 29000, 15816/15872 identical sites); California, USA (KY969480,  
109 score 28755, 15773/15874 identical sites); Virginia, USA (JN635404, score 28731,  
110 15782/15894 identical sites) and London, England (KT732231, score 28476,  
111 15592/15678 identical sites).

112 Finally, a dataset containing all 42 complete measles genomes belonging to the  
113 genotype D8 available in GenBank in 06-Nov- 2018, and the sequence obtained in this

114 study, were analyzed with jModeltest 2.1.7 v20150220 and likelihood scores were  
115 computed for five substitutions schemes (40 models). The GTR+I model was selected by  
116 AICc and used for Bayesian phylogenetic reconstruction using two runs with 20mi  
117 generations with MrBayes 3.2.6 (8). This analysis showed two main clades, one  
118 containing 31 sequences from the United Kingdom 2012-2013, one from Netherlands  
119 (2013), one from Canada (2010), one from Germany (2013), two from Vietnam (2014),  
120 and one sequence from Texas, USA (2007), as the outgroup. The second clade contains  
121 the same five sequences returned from the BLAST analysis with the highest scores, from  
122 Italy (2017), Australia (2015), United Kingdom (2012), and two from USA, California  
123 (2010) and Virginia (2009), been this last one the outgroup of this clade. Furthermore, the  
124 Bayesian tree showed that the isolate MVs/Roraima.BRA/31.18[D8] grouped in this  
125 second clade, close together with the sample from Brisbane, Australia, collected in 2015  
126 and the sample from Ancona, Italy collected in November 2017, with a high posterior  
127 probability (1.0) (Figure).

128 Surprisingly, we did not find any measles complete genome record from Latin  
129 America on the public databases including GenBank, Virus Pathogen Resource (ViPR -  
130 [www.viprbrc.org](http://www.viprbrc.org)), and MeaNS. This fact hindered a more detailed analysis of the  
131 complete genome reported in this study in the context of the local transmission,  
132 strengthening the necessity of sequencing more fully genomes from this region.

133 Previous studies in Brazil have primarily concentrated on genotyping a small  
134 fragment of 450bp of the measles nucleoprotein (9,10). Although, these studies have  
135 undoubtedly contributed to the molecular epidemiology of measles, sequencing larger  
136 genome fragments or better yet, complete viral genomes, is pivotal for a better

137 understanding of the epidemic dynamics of any emerging or remerging viral diseases  
138 (11,12).

139

140 **Nucleotide sequence accession number:**

141 The complete genome sequence of the MVs/Roraima.BRA/31.18[D8] isolate is  
142 available at GenBank under the accession number MK161348.

143

144 **ACKNOWLEDGMENTS**

145 FGN is funded by Fundação de Amparo à Pesquisa do Estado do Amazonas –  
146 FAPEAM ([www.fapeam.am.gov.br](http://www.fapeam.am.gov.br), call 001/2013 – PPSUS / 062.00656/2014 and call  
147 001/2014 – PROEP / 062.01939/2014); Conselho Nacional de Desenvolvimento  
148 Científico e Tecnológico (<http://www.cnpq.br>, grant 440856/2016-7) and Coordenação  
149 de Aperfeiçoamento de Pessoal de Nível Superior (<http://www.capes.gov.br>, grants  
150 88881.130825/2016-01 and 88887.130823/2016-00) call MCTIC/FNDCT -CNPq / MEC-  
151 CAPES/ MS-Decit 14/2016 – Prevenção e Combate ao vírus Zika. The authors thank the  
152 Program for Technological Development in Tools for Health-PDTIS FIOCRUZ for use  
153 of nucleotide sequencing facilities at ILMD—Fiocruz Amazônia. The funders had no role  
154 in study design, data collection and analysis, decision to publish, or preparation of the  
155 manuscript.

156

157

158 **REFERENCES**

- 159 1. Moss WJ. Measles. *Lancet*. 2017; 390(10111): 2490-2502.
- 160 2. Steinhauer DA, Holland JJ. Rapid evolution of RNA viruses. *Annu Rev*  
161 *Microbiol*. 1987; 41: 409-33.
- 162 3. Rota PA, Moss WJ, Takeda M, de Swart RL, Thompson KM, Goodson JL.  
163 Measles. *Nat Rev Dis Primers*. 2016; 2: 16049.
- 164 4. Katoh K, Standley DM. MAFFT multiple sequence alignment software version  
165 7: improvements in performance and usability. *Mol Biol Evol*. 2013; 30(4):  
166 772-80.
- 167 5. Quick J, Grubaugh ND, Pullan ST, Claro IM, Smith AD, Gangavarapu K,  
168 Oliveira G, Robles-Sikisaka R, Rogers TF, Beutler NA, Burton DR, Lewis-  
169 Ximenez LL, de Jesus JG, Giovanetti M, Hill SC, Black A, Bedford T, Carroll  
170 MW, Nunes M, Alcantara LC Jr, Sabino EC, Baylis SA, Faria NR, Loose M,  
171 Simpson JT, Pybus OG, Andersen KG, Loman NJ. Multiplex PCR method for  
172 MinION and Illumina sequencing of Zika and other virus genomes directly  
173 from clinical samples. *Nat Protoc*. 2017; 12(6): 1261-1276.
- 174 6. Kearse M, Moir R, Wilson A, Stones-Havas S, Cheung M, Sturrock S, Buxton  
175 S, Cooper A, Markowitz S, Duran C, Thierer T, Ashton B, Meintjes P,  
176 Drummond A. Geneious Basic: an integrated and extendable desktop software  
177 platform for the organization and analysis of sequence data. *Bioinformatics*.  
178 2012; 28(12): 1647-9.
- 179 7. Guindon S, Dufayard JF, Lefort V, Anisimova M, Hordijk W, Gascuel O. New  
180 algorithms and methods to estimate maximum-likelihood phylogenies:  
181 assessing the performance of PhyML 3.0. *Syst Biol*. 2010; 59(3): 307-21.



- 182 8. Ronquist F, Teslenko M, van der Mark P, Ayres DL, Darling A, Höhna S,  
183 Larget B, Liu L, Suchard MA, Huelsenbeck JP. MrBayes 3.2: Efficient  
184 Bayesian phylogenetic inference and model choice across a large model space.  
185 *Syst Biol.* 2012; 61(3): 539-42.
- 186 9. Oliveira MI, Afonso AM, Adelaide CF, Lemos XR, Almeida J, Frugis Yu AL,  
187 Curti SP. Genetic diversity of measles virus-resurgence of new genotype D8 in  
188 São Paulo, Brazil. *Rev Inst Med Trop Sao Paulo.* 2014; 56(4): 366.
- 189 10. Oliveira MI, Rota PA, Curti SP, Figueiredo CA, Afonso AM, Theobaldo M,  
190 Souza LT, Liffick SL, Bellini WJ, Moraes JC, Stevien KE, Durigon EL.  
191 Genetic homogeneity of measles viruses associated with a measles outbreak,  
192 São Paulo, Brazil, 1997. *Emerg Infect Dis.* 2002; 8(8): 808-13.
- 193 11. Dudas G, Carvalho LM, Bedford T, Tatem AJ, Baele G, Faria NR, Park DJ,  
194 Ladner JT, Arias A, Asogun D, Bielejec F, Caddy SL, Cotten M, D'Ambrozio J,  
195 Dellicour S, Di Caro A, Diclaro JW, Duraffour S, Elmore MJ, Fakoli LS, Faye  
196 O, Gilbert ML, Gevao SM, Gire S, Gladden-Young A, Gnirke A, Goba A,  
197 Grant DS, Haagmans BL, Hiscox JA, Jah U, Kugelman JR, Liu D, Lu J,  
198 Malboeuf CM, Mate S, Matthews DA, Matranga CB, Meredith LW, Qu J,  
199 Quick J, Pas SD, Phan MVT, Pollakis G, Reusken CB, Sanchez-Lockhart M,  
200 Schaffner SF, Schieffelin JS, Sealfon RS, Simon-Loriere E, Smits SL, Stoecker  
201 K, Thorne L, Tobin EA, Vandi MA, Watson SJ, West K, Whitmer S, Wiley  
202 MR, Winnicki SM, Wohl S, Wölfel R, Yozwiak NL, Andersen KG, Blyden SO,  
203 Bolay F, Carroll MW, Dahn B, Diallo B, Formenty P, Fraser C, Gao GF, Garry  
204 RF, Goodfellow I, Günther S, Happi CT, Holmes EC, Kargbo B, Keita S,

205 Kellam P, Koopmans MPG, Kuhn JH, Loman NJ, Magassouba N, Naidoo D,  
206 Nichol ST, Nyenswah T, Palacios G, Pybus OG, Sabeti PC, Sall A, Ströher U,  
207 Wurie I, Suchard MA, Lemey P, Rambaut A. Virus genomes reveal factors that  
208 spread and sustained the Ebola epidemic. *Nature*. 2017; 544(7650): 309-315.

209 12. Faria NR, Kraemer MUG, Hill SC, Goes de Jesus J, Aguiar RS, Iani FCM,  
210 Xavier J, Quick J, du Plessis L, Dellicour S, Thézé J, Carvalho RDO, Baele G,  
211 Wu CH, Silveira PP, Arruda MB, Pereira MA, Pereira GC, Lourenço J,  
212 Obolski U, Abade L, Vasylyeva TI, Giovanetti M, Yi D, Weiss DJ, Wint GRW,  
213 Shearer FM, Funk S, Nikolay B, Fonseca V, Adelino TER, Oliveira MAA,  
214 Silva MVF, Sacchetto L, Figueiredo PO, Rezende IM, Mello EM, Said RFC,  
215 Santos DA, Ferraz ML, Brito MG, Santana LF, Menezes MT, Brindeiro RM,  
216 Tanuri A, Dos Santos FCP, Cunha MS, Nogueira JS, Rocco IM, da Costa AC,  
217 Komninakis SCV, Azevedo V, Chieppe AO, Araujo ESM, Mendonça MCL,  
218 dos Santos CC, dos Santos CD, Mares-Guia AM, Nogueira RMR, Sequeira PC,  
219 Abreu RG, Garcia MHO, Abreu AL, Okumoto O, Kroon EG, de Albuquerque  
220 CFC, Lewandowski K, Pullan ST, Carroll M, de Oliveira T, Sabino EC, Souza  
221 RP, Suchard MA, Lemey P, Trindade GS, Drumond BP, Filippis AMB, Loman  
222 NJ, Cauchemez S, Alcantara LCJ, Pybus OG. Genomic and epidemiological  
223 monitoring of yellow fever virus transmission potential. *Science*. 2018;  
224 361(6405): 894-899.

225

226 **Figure:** Phylogenetic tree of complete measles virus genomes. A mid-rooted Bayesian  
227 tree with increasing node order was constructed with MrBayes 3.2.6 and 43 taxa  
228 (complete CDS and intergenic regions from position 108 to 15,785 related to the  
229 reference sequence NC\_001498.1) representing all the complete measles (genotype D8)  
230 genomes available at GenBank in 06-Nov-2018 and the sequence reported in this study.  
231 Branches are colored by posterior probabilities, according to the legend, and the specific  
232 posterior probabilities values are shown. The clade containing the sequence described in  
233 this study is highlighted in yellow. The scale bar represents nucleotide substitutions per  
234 site.

235

236 **Supplemental file 1.** Primers designed to amplify and to sequence the entire genome of  
237 measles Genotype D8.

238

239 **Supplemental file 2.** Primers sets used to amplify and to sequence the entire measles  
240 genome. Four amplicons were generated: Amplicon 1 (primers 5UTR + 11R, 3614bp);  
241 Amplicon 2 (11L + 26R, 5003bp); Amplicon 3 (24L + 40R, 5405bp); Amplicon 4 (37L +  
242 3UTR, 4682bp). Each amplicon was sequenced with the primers listed below each  
243 scheme.

244

245 **Supplemental file 3.** Phylogenetic tree of measles genotypes based in the N gene. A mid-  
246 rooted ML tree with increasing node order was constructed with PhyML online server  
247 available at <http://www.atgc-montpellier.fr/phyml/>. All 24 genotypes and the four

248 lineages of genotype D8 are represented. The D8 sequences are grouped in the blue clade,  
249 whereas the clade containing the Roraima sample is highlighted in yellow.  
250

Posterior

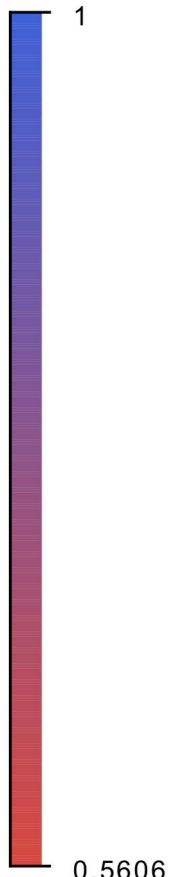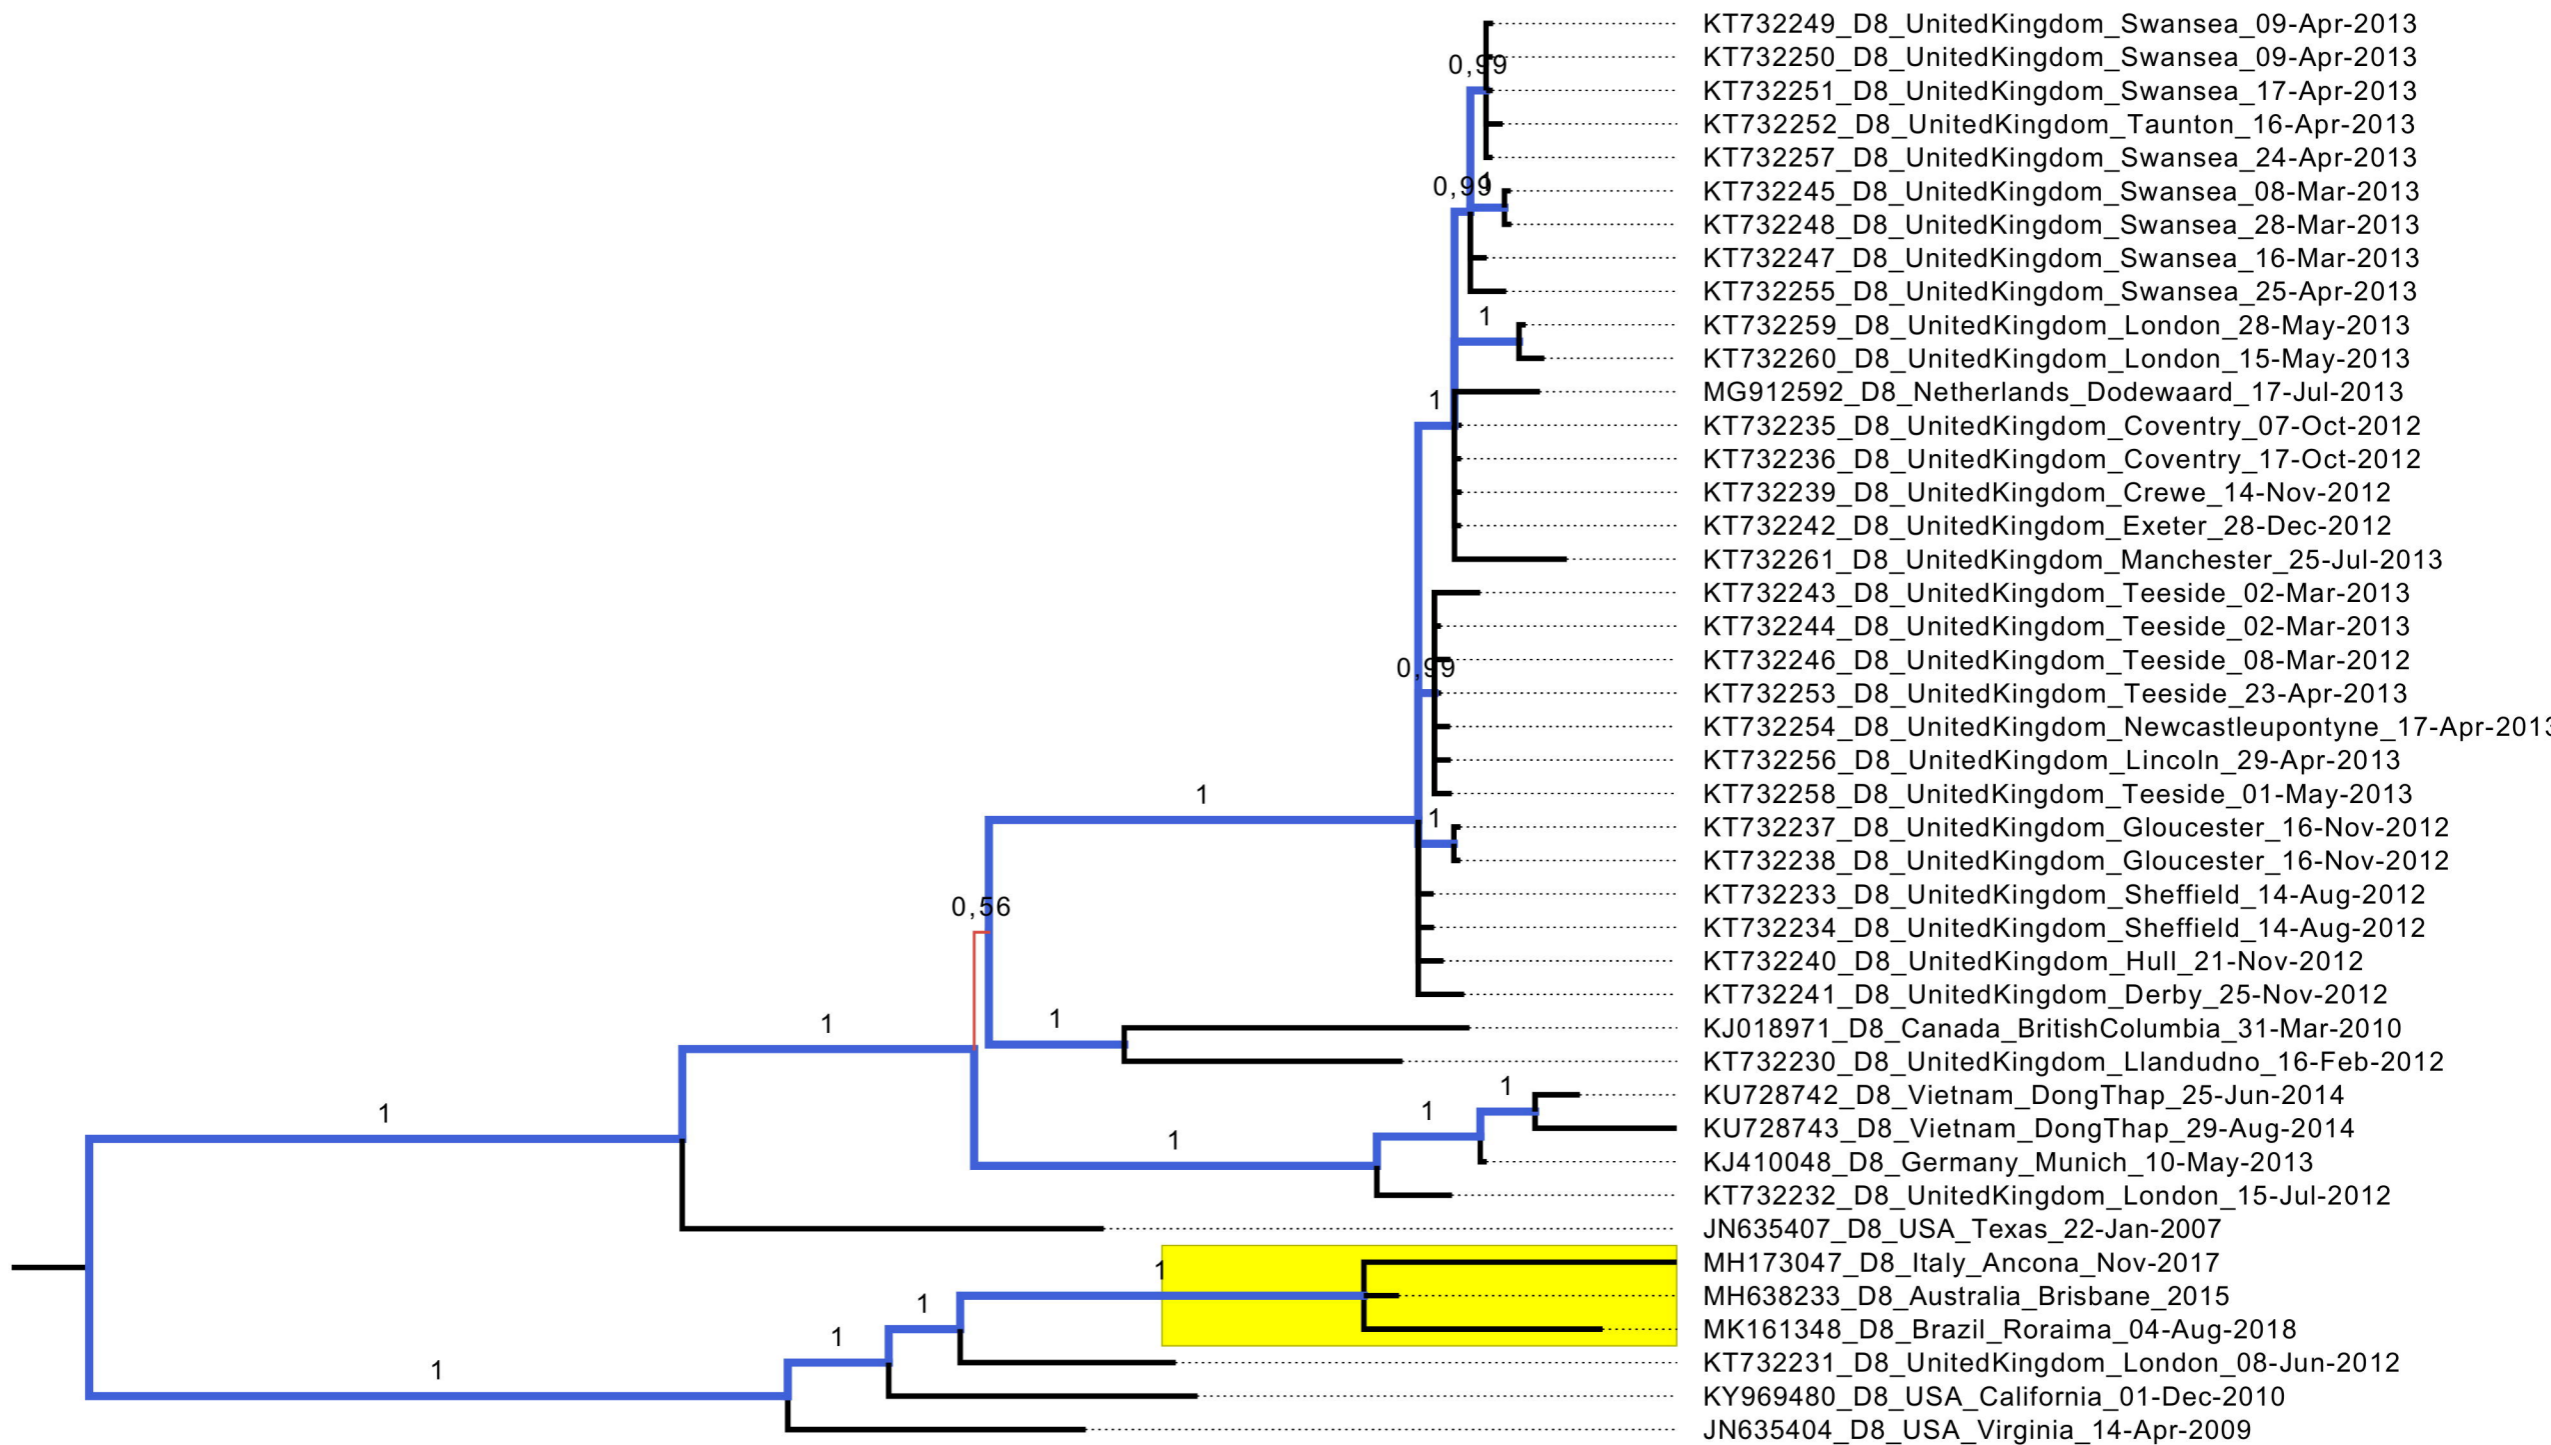

0.0010
